# Supplementary material
Source: PubMed Central journal article supplement (PMC7718609)
Supplement: NIHMS1542741-supplement-2.pdf [file NIHMS1542741-supplement-2.pdf]

| <b>Slice Thickness</b> | <b>No. of Studies</b> | <b>AUC</b> |
|------------------------|-----------------------|------------|
| < 2 mm                 | D <sub>2</sub> = 35   | AUC = .87  |
|                        | D <sub>3</sub> = 11   | AUC = .84  |
| 2 - 5 mm               | D <sub>2</sub> = 27   | AUC = .85  |
|                        | D <sub>3</sub> = 16   | AUC = .80  |

**Table S1.** Model performance (in terms of AUC) as a function of slice thickness in the validation sets.

| Covariate (Feature)                                | Hazard Ratio (HR) | 95% CI    | p-value       |
|----------------------------------------------------|-------------------|-----------|---------------|
| <i>Laws (per heterogeneity increase)</i>           | 0.87              | 0.66 1.15 | 0.35          |
| <i>Haralick (per texture correlation increase)</i> | 1.56              | 1.16 2.08 | <b>0.0027</b> |
| <i>Gabor (per density of lesion increase)</i>      | 0.85              | 0.66 1.09 | 0.22          |
| <i>Haralick (per entropy increase)</i>             | 1.65              | 1.19 2.27 | <b>0.0023</b> |
| <i>Gabor (per density of lesion increase)</i>      | 0.85              | 0.63 1.1  | 0.21          |
| <i>CoLIAGe (per entropy increase)</i>              | 0.85              | 0.67 1.2  | 0.23          |
| <i>Gabor (per density of lesion increase)</i>      | 1.15              | 0.85 1.57 | 0.35          |
| <i>Laws (per heterogeneity increase)</i>           | 1.38              | 1.23 1.82 | <b>0.024</b>  |
| <i>Sex (male vs. female)</i>                       | 1.47              | 0.75 2.45 | 0.18          |
| <i>Race (White or Black)</i>                       | 1.14              | 0.53 2.46 | 0.72          |
| <i>Histology (adeno vs. SCC)</i>                   | 1.04              | 0.58 1.85 | 0.8           |
| <i>EGFR mutation (yes vs. no)</i>                  | 0.93              | 0.45 2.11 | 0.81          |
| <i>Smoking (smoker vs. non-smoker)</i>             | 1.37              | 0.64 2.82 | 0.42          |

**Table S2.** Univariable Cox regression analysis for top eight selected texture features and six clinicopathologic variables in the discovery cohort  $D_1$ .

| Variable | HR (95% Confidential Interval), p-value |                         |                          |
|----------|-----------------------------------------|-------------------------|--------------------------|
|          | D <sub>1</sub>                          | D <sub>2</sub>          | D <sub>3</sub>           |
| Gender   | 1.34 (0.68 - 2.64), .39                 | 1.1 (0.47 – 2.14), .52  | .95 (0.55 – 2.34), .64   |
| Smoking  | 1.22 (0.52 - 2.84), .64                 | 1.73 (0.71 – 2.33), .22 | 1.81 (0.63 – 2.02), .37  |
| DRS      | 1.6 (1.17 – 2.16), .0027                | 1.66 (1.25 – 2.24), .01 | 1.95 (1.48 – 2.28), .022 |

**Table S3.** Multivariable Cox regression analysis for OS in D<sub>1</sub>, D<sub>2</sub> and D<sub>3</sub>.

| <b>Cut off criteria</b> | <b>Low PDL-1 score</b> | <b>High PDL-1 score</b> |
|-------------------------|------------------------|-------------------------|
| 1                       | 0 – 1 %                | > 1%                    |
| 2                       | 0 – 10 %               | > 10%                   |
| 3                       | 0 – 50%                | > 50%                   |

**Table S4.** *Cut-off criteria for PD-L1 expression grouping*

| Patients with different cycles of therapy in validation set | Correct decision by classifier in validation set | Incorrect decision by classifier in validation set |
|-------------------------------------------------------------|--------------------------------------------------|----------------------------------------------------|
| N1 = 62                                                     | 55                                               | 7                                                  |
| N2 = 15                                                     | 11                                               | 4                                                  |

**Table S5.** The number of correct and incorrect decisions made by the classifier in predicting response treatment after 2 or 3 cycles of ICI.
